# Supplementary material
Source: PubMed Central journal article supplement (PMC7964389)
Supplement: 2682_tables.pdf [file 2682_tables.pdf]

**On-line Table 1: Imaging parameters of the different FLAIR sequences**

|                            | 1.5T FLAIR | 3T FLAIR  | PROPELLER-FLAIR | Cube-FLAIR |
|----------------------------|------------|-----------|-----------------|------------|
| FOV (mm)                   | 220 × 220  | 220 × 220 | 220 × 220       | 240 × 240  |
| Matrix size                | 256 × 256  | 320 × 320 | 384 × 384       | 224 × 224  |
| TR (ms)                    | 8500       | 8500      | 8000            | 6000       |
| TE (ms)                    | 74         | 120       | 134.4           | 110        |
| TI (ms)                    | 2500       | 2250      | 2000            | 1897       |
| No. of sections            | 23         | 23        | 23              | 256        |
| Section thickness (mm)     | 5          | 5         | 5               | 1.4        |
| Orientation of acquisition | Axial      | Axial     | Axial           | Sagittal   |
| Duration (min:sec)         | 3:26       | 3:58      | 3:28            | 6:09       |

**On-line Table 2: Characteristics and MR imaging findings of patients with SAH**

| Patient | Sex/Age (yr) | Delay between CT and MRI (day) | SAH on CT                             | 3T FLAIR                                      |                                                   | Cube-FLAIR     |                 |
|---------|--------------|--------------------------------|---------------------------------------|-----------------------------------------------|---------------------------------------------------|----------------|-----------------|
|         |              |                                |                                       | False-Positive                                | False-Negative                                    | False-Positive | False-Negative  |
| 1       | F/48         | 1                              | R Sulc<br>L Sulc                      | –                                             | –                                                 | –              | L Sulc (R1)     |
| 2       | M/53         | 1                              | PMC<br>PPC<br>PMDC                    | –                                             | PMC (R1 + 2)<br>PPC (R1 + 2)<br>PMDC (R1 + 2)     | –              | –               |
| 3       | M/72         | 2                              | R Sulc                                | SSC (R2)<br>PMC (R2)<br>PPC (R2)<br>PMDC (R2) | –                                                 | –              | –               |
| 4       | M/63         | 1                              | SSC<br>PMC<br>PPC<br>PMDC             | 4th V (R2)                                    | SSC (R1)<br>PMC (R1)<br>PPC (R1)<br>PMDC (R1)     | –              | –               |
| 5       | F/34         | 1                              | R+L LV<br>SSC<br>PMC<br>PPC<br>PMDC   | R Sulc (R1)<br>L Sulc (R1)                    | 3rd V (R2)<br>4th V (R1 + 2)                      | –              | –               |
| 6       | F/69         | 3                              | PPC<br>PMDC                           | –                                             | PPC (R1 + 2)<br>PMDC (R1 + 2)                     | –              | –               |
| 7       | M/42         | 3                              | R+L Sulc<br>SSC<br>PMC<br>PPC<br>PMDC | 3rd + 4th V (R2)                              | SSC (R1 + 2)<br>PMC (R1)<br>PPC (R1)<br>PMDC (R1) | –              | –               |
| 8       | F/58         | 1                              | L Sulc<br>PMC<br>PPC                  | –                                             | L Sulc (R1 + 2)<br>PMC (R1 + 2)<br>PPC (R1 + 2)   | –              | L Sulc (R1 + 2) |
| 9       | M/62         | 1                              | PMC<br>PPC                            | SSC (R1 + 2)<br>4th + PMDC (R2)               | –                                                 | –              | –               |
| 10      | F/74         | 3                              | R Sulc                                | SSC (R1), PPC (R2)<br>PMDC (R1 + 2)           | –                                                 | –              | –               |

**Note:**—R, right; L, left; Sulc, sulcal; LV, lateral ventricle; V, ventricle; SSC, suprasellar cistern; MRI = MR imaging; PMC, perimesencephalic cistern; PPC, prepontine cistern; PMDC, perimedullary cistern; –, not present; R, reader.
